# Supplementary material for: Exploring the Relationship Between Dental Students’ Communication Apprehension and Hybrid Course Satisfaction in Inverted Classroom Models: A Cross-Sectional Study
Source: Research Square preprint supplement (doi:10.21203/rs.3.rs-6872752/v1), 2025-09-03
Supplement: Supplementary file 1 [file ccb5cb476c0c0b6283dbaf89.docx]

**Personal Report of Communication Apprehension (PRCA-24)**

Directions: This instrument is composed of twenty-four statements concerning your feelings about communication with other people. Please indicate in the space provided the degree to which each statement applies to you by marking whether you (1) Strongly Agree, (2) Agree, (3) Are Undecided, (4) Disagree, or (5) Strongly Disagree with each statement. There are no right or wrong answers. Many of the statements are similar to other statements. Do not be concerned about this. Work quickly; just record your first impressions.

____ 1. I dislike participating in group discussions.

____ 2. Generally, I am comfortable while participating in group discussions.

____ 3. I am tense and nervous while participating in group discussions.

____ 4. I like to get involved in group discussions.

____ 5. Engaging in a group discussion with new people makes me tense and nervous.

____ 6. I am calm and relaxed while participating in group discussions.

____ 7. Generally, I am nervous when I have to participate in a meeting.

____ 8. Usually I am calm and relaxed while participating in meetings.

____ 9. I am very calm and relaxed when I am called upon to express an opinion at a meeting.

____ 10. I am afraid to express myself at meetings.

____ 11. Communicating at meetings usually makes me uncomfortable.

____ 12. I am very relaxed when answering questions at a meeting.

____ 13. While participating in a conversation with a new acquaintance, I feel very nervous.

____ 14. I have no fear of speaking up in conversations.

____ 15. Ordinarily I am very tense and nervous in conversations.

____ 16. Ordinarily I am very calm and relaxed in conversations.

____ 17. While conversing with a new acquaintance, I feel very relaxed.

____ 18. I am afraid to speak up in conversations.

____ 19. I have no fear of giving a speech.

____ 20. Certain parts of my body feel very tense and rigid while giving a speech.

____ 21. I feel relaxed while giving a speech.

____ 22. My thoughts become confused and jumbled when I am giving a speech.

____ 23. I face the prospect of giving a speech with confidence.

____ 24. While giving a speech, I get so nervous I forget facts I really know.

**Course Experience Questionnaire (CEQ)**

Directions: This instrument is composed of 10 statements concerning feelings about the offline course. Please indicate the degree to which each statement applies to you by marking whether you:

Strongly Disagree = 1; Disagree = 2; are Neutral = 3; Agree = 4; Strongly Agree = 5

_____1. The instruction approach currently used contributes to my learning course content.

_____2. I feel relax and comfort in this approach.

_____3. The course format is helping me to prepare my future professional life better.

_____4. The course format is helping me to prepare my exam better and receive higher score.

_____5. I spend less time on learning this course.

_____6. The course format is helping me to improve my communication skills.

_____7. The online part of ICM class contributes to my learning course content.

_____8. Students discussion section contributes to my learning course content.

_____9. Students presentation section contributes to my learning course content.

_____10. Teacher-student interaction section on the class meeting contributes to my learning course content.

**Online Course Satisfaction Survey (OCSS)**

Directions: This instrument is composed of 24 statements concerning feelings about the online courses and e-platform. Please indicate the degree to which each statement applies to you by marking whether you:

Strongly Disagree = 1; Disagree = 2; are Neutral = 3; Agree = 4; Strongly Agree = 5

_____1. Class assignments were clearly communicated to me.

_____2. Feedback and evaluation of papers, tests, and other assignments was given in a timely manner.

_____3. The instructor makes me feel that I am part of the class and belong.

_____4. I am dissatisfied with the accessibility and availability of the instructor.

_____5. I am satisfied with the use of “threaded” online discussions and/or forums.

_____6. I am satisfied with the use of email.

_____7. I am satisfied with how I am able to navigate within EDEMTET (the course management system).

_____8. I am dissatisfied with download times of resources in EDEMTET.

_____9. I am satisfied with the frequency I have to attend class (e.g., log in to the course).

_____10. I am satisfied with the flexibility this course affords me.

_____11. I am dissatisfied with the level of self-directedness I am given.

_____12. I am satisfied with how much I enjoy working on projects by myself.

_____13. I am satisfied with the quality of interaction between all involved parties.

_____14. I am dissatisfied with the process of collaboration activities during the course.

_____15. I am satisfied with how much I could relate to the other students.

_____16. I am satisfied with how comfortable with participating I became.

_____17. I am satisfied with the level of effort this course required.

_____18. I am dissatisfied with my performance in this course.

_____19. I will be satisfied with my final grade in the course.

_____20. I am satisfied with how I am able to apply what I have learned in this course.

_____21. I am satisfied enough with this course to recommend it to others.

_____22. Compared to other course settings, I am less satisfied with this learning experience.

_____23. My level of satisfaction in this course would encourage me to enroll in another course in this setting.

_____24. Overall, I am satisfied with this course.
